# Supplementary material
Source: publisher site journal article supplement (https://www.dovepress.com/article/378090)
Supplement: Supplementary file 1 [file get_supplementary_file.php]

### Supplementary S1 Sequences of the primers

| Gene           | Forward                | Reverse                 |
|----------------|------------------------|-------------------------|
| <i>β-ACTIN</i> | TGTCCACCTTCCAGCAGATGT  | AGCTCAGTAACAGTCCGCCTAGA |
| <i>IL-1β</i>   | TCCTCTGTGACTCGTGGGAT   | TCAGACAGCACGAGGCATTT    |
| <i>ARG-1</i>   | ACCCTGACCTATGCGTCATT   | ATTCCCAGAGCTGGTTGTCA    |
| <i>SIRT1</i>   | GTGTCATAGGTTAGGTGGCGAG | GAAGAGGTGTTGGTGGCAACTC  |
| <i>NAMPT</i>   | GATTCTGGAAATCCGCTCGA   | TGACTCTAAGGTAAGGTGGCAGC |
| <i>TPI1</i>    | GTCCTGGCCTATGAACCAGT   | TACTTCCTGGGCCTGTTGA     |
| <i>TGM2</i>    | TTCCGGCTGACACTGTACTT   | CAGGATCCCTCCTCCACATC    |
| <i>PKM2</i>    | CATGCTGTCCGGAGAAACAG   | TCTCGAGCTATCAGGTGCTG    |
| <i>PKM1</i>    | AGCCTCCAGTCAATCCACAGA  | ACGGCATCCTTACACAGCACA   |
| <i>MAF</i>     | GTCAGCAAGGAGGAGGTGAT   | ATCTCCTGCTTGAGGTGGTC    |
| <i>PPAR-γ</i>  | GGAGATCCTCCTGTTGACCC   | TGGGTCAGCTCTTGTGAACG    |

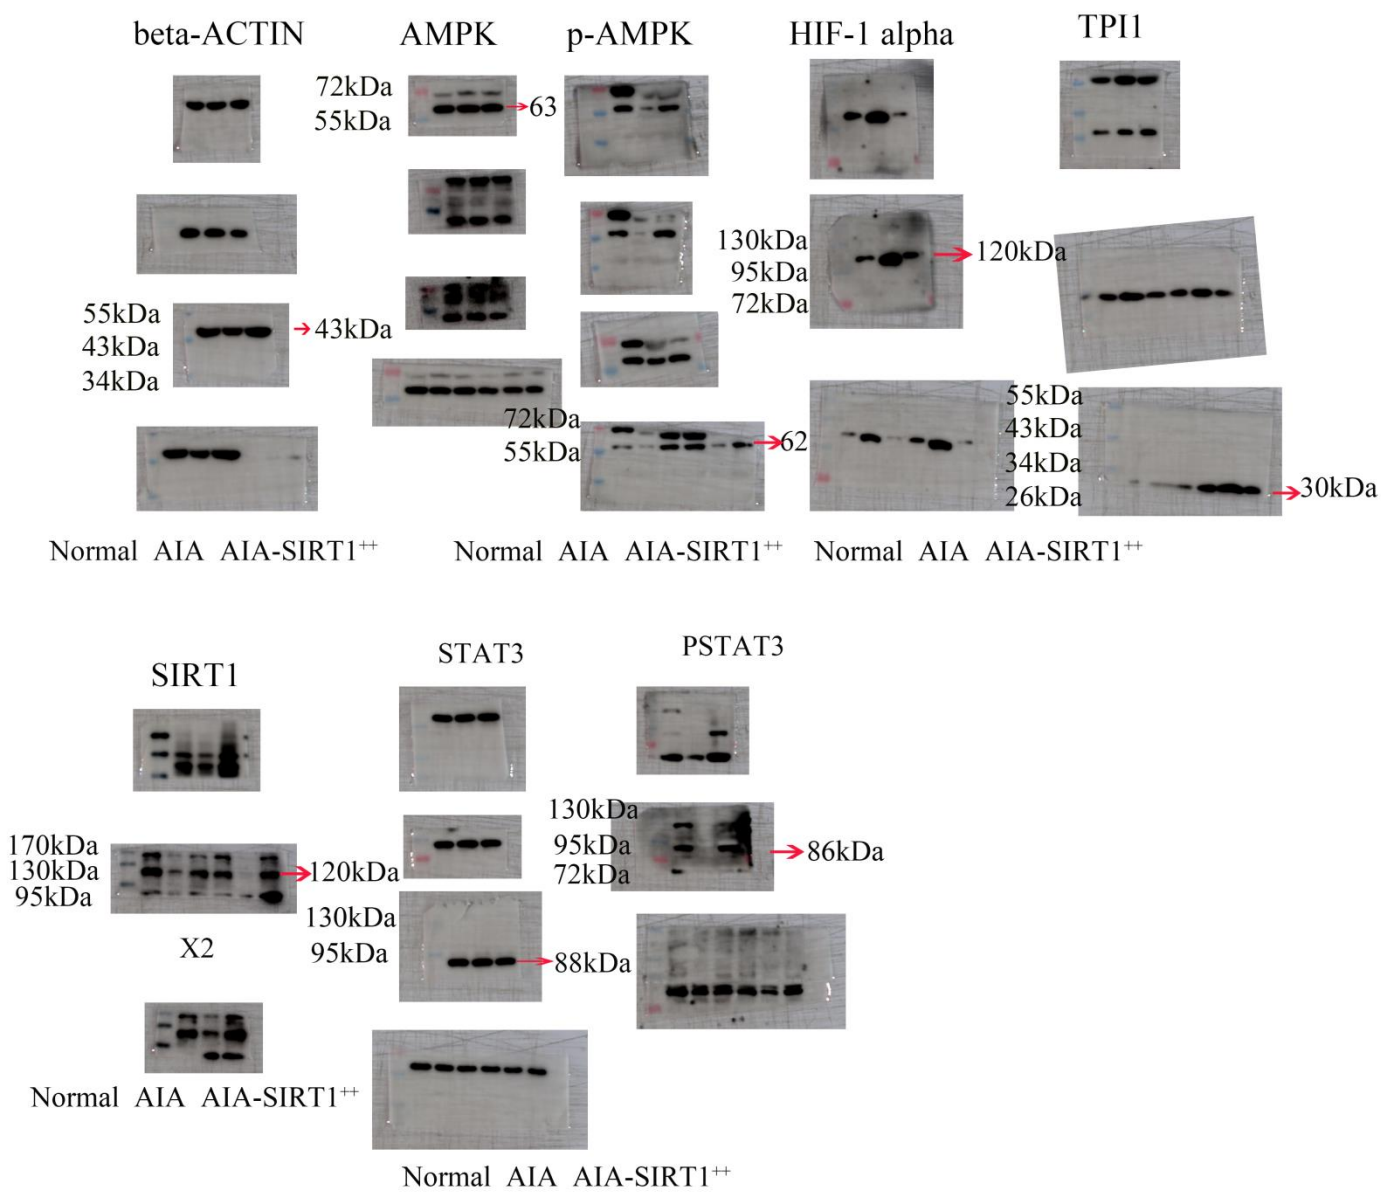

**Supplementary S2** Raw WB images for Figure 5.

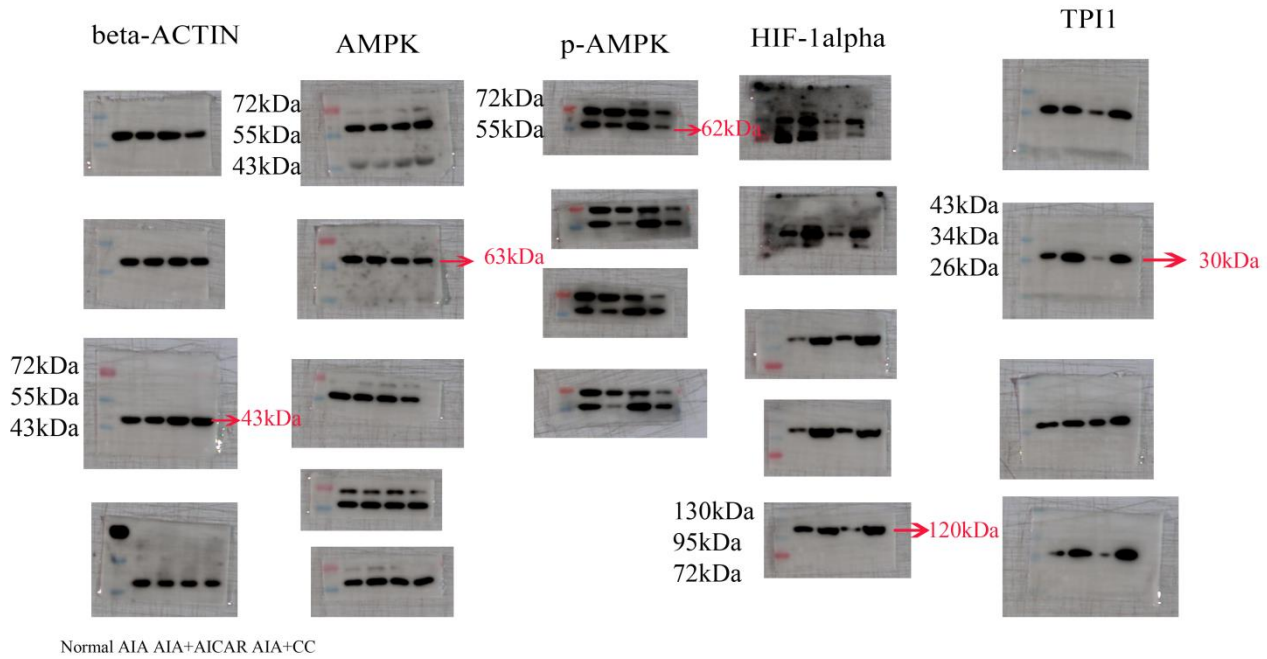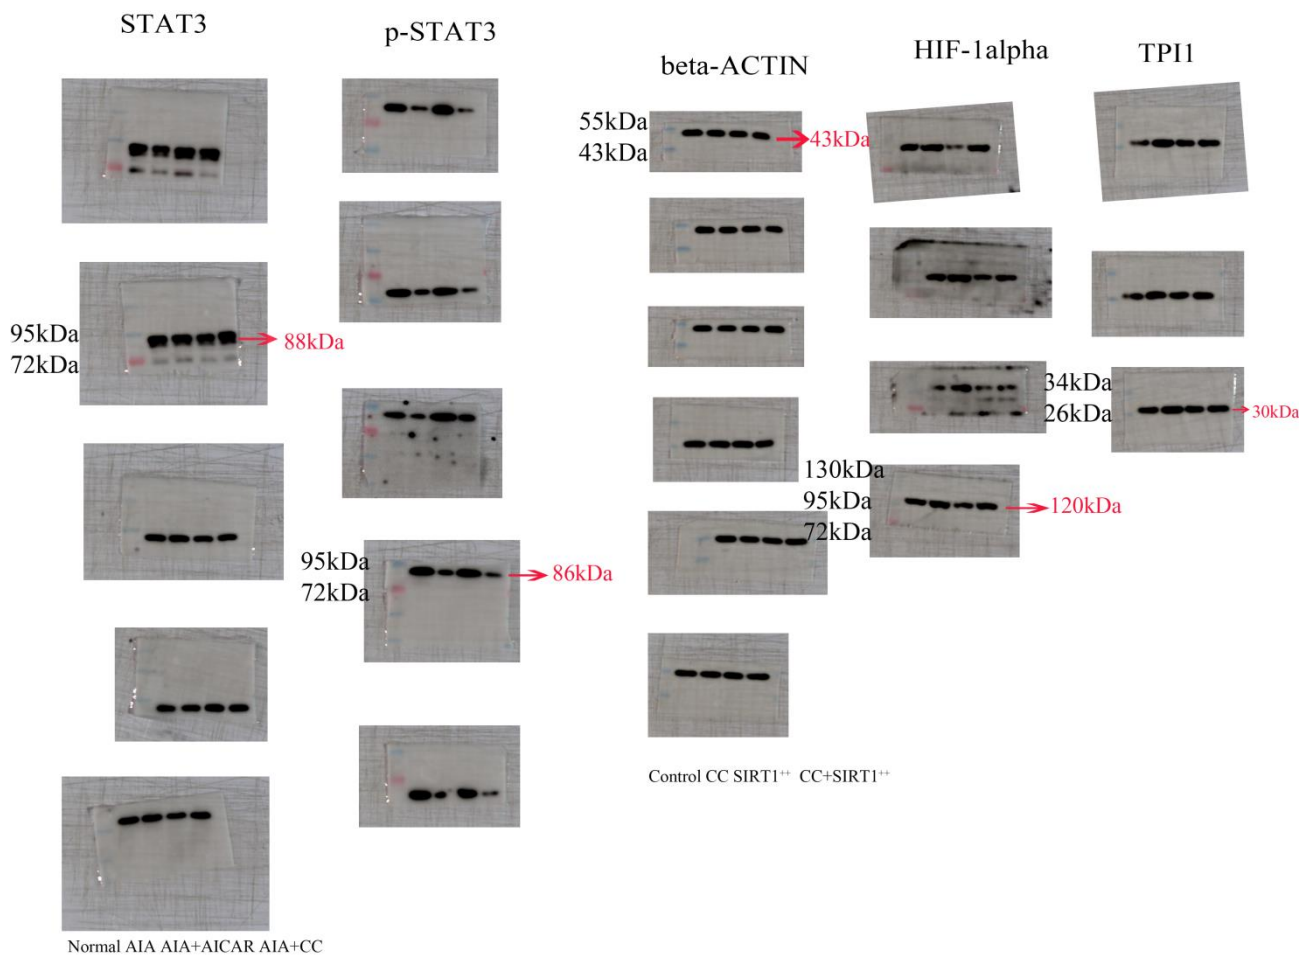

Supplementary S3 Raw WB images for Figure 6.
